# Supplementary material for: Unlocking the Power of Artificial Intelligence: Accurate Zeta Potential Prediction Using Machine Learning
Source: MDPI journal article supplement (doi:10.3390/nano13071209), 2023-03-29
Supplement: s1 [file s1]

# Unlocking the Power of Artificial Intelligence: Accurate Zeta Potential Prediction using Machine Learning

Rizwan Muneer <sup>1</sup>, Muhammad Rehan Hashmet <sup>2,\*</sup>, Peyman Pourafshary <sup>1</sup> and Mariam Shakeel <sup>1</sup>

<sup>1</sup> School of Mining and Geosciences, Nazarbayev University, Astana 010000, Kazakhstan.

<sup>2</sup> Department of Chemical and Petroleum Engineering, United Arab Emirates University.

\* Corresponding Author

Table S1. Input Data for machine learning models.

| <i>Study</i>          | <i>Temp.</i> | <i>NPs</i><br><i>Size</i> | <i>KCl</i><br><i>Conc.</i> | <i>NaCl</i><br><i>Conc.</i> | <i>NPs</i><br><i>Conc.</i> | <i>pH</i> | <i>Medium</i> | <i>Zeta</i><br><i>Potential</i> |
|-----------------------|--------------|---------------------------|----------------------------|-----------------------------|----------------------------|-----------|---------------|---------------------------------|
|                       | °C           | nm                        | ppm                        | ppm                         | wt%                        |           |               | mV                              |
| Parizad et al.<br>[1] | 30           | 15                        | 10000                      | 0                           | 0.1                        | 9.5       | Water         | -42                             |
|                       | 30           | 15                        | 10000                      | 0                           | 0.25                       | 9.5       | Water         | -45                             |
|                       | 30           | 15                        | 10000                      | 0                           | 0.75                       | 9.5       | Water         | -46                             |
|                       | 30           | 15                        | 10000                      | 0                           | 0.25                       | 9.5       | Water         | -45.1                           |
|                       | 50           | 15                        | 10000                      | 0                           | 0.25                       | 9.5       | Water         | -43                             |
|                       | 70           | 15                        | 10000                      | 0                           | 0.25                       | 9.5       | Water         | -39.1                           |
|                       | 30           | 15                        | 10000                      | 0                           | 0.25                       | 9.5       | Water         | -45.1                           |
|                       | 30           | 15                        | 30000                      | 0                           | 0.25                       | 9.5       | Water         | -28.1                           |
|                       | 30           | 15                        | 60000                      | 0                           | 0.25                       | 9.5       | Water         | -15.1                           |
| Kun Ma et al.<br>[2]  | 25           | 15                        | 0                          | 0                           | 0.05                       | 1         | Water         | 0.342                           |
|                       | 25           | 15                        | 0                          | 0                           | 0.05                       | 2         | Water         | -1.44                           |
|                       | 25           | 15                        | 0                          | 0                           | 0.05                       | 3         | Water         | -12.5                           |
|                       | 25           | 15                        | 0                          | 0                           | 0.05                       | 4         | Water         | -20.1                           |
|                       | 25           | 15                        | 0                          | 0                           | 0.05                       | 5         | Water         | -25.4                           |
|                       | 25           | 15                        | 0                          | 0                           | 0.05                       | 6         | Water         | -28.7                           |
|                       | 25           | 15                        | 0                          | 0                           | 0.05                       | 7         | Water         | -29                             |
|                       | 25           | 15                        | 0                          | 0                           | 0.05                       | 8         | Water         | -32.1                           |
|                       | 25           | 15                        | 0                          | 0                           | 0.05                       | 9         | Water         | -20.5                           |
|                       | 25           | 15                        | 0                          | 0                           | 1                          | 7         | Water         | -42.9                           |
|                       | 90           | 15                        | 0                          | 0                           | 1                          | 7         | Water         | -40.4                           |
| Wang et al.<br>[3]    | 5            | 20                        | 0                          | 0                           | 1                          | 7         | Water         | -39.8                           |
|                       | 5            | 20                        | 0                          | 0                           | 2                          | 7         | Water         | -36.6                           |
|                       | 5            | 20                        | 0                          | 0                           | 3                          | 7         | Water         | -31.4                           |
|                       | 5            | 20                        | 0                          | 0                           | 4                          | 7         | Water         | -25.9                           |
|                       | 5            | 20                        | 0                          | 0                           | 5                          | 7         | Water         | -24.1                           |
|                       | 5            | 20                        | 0                          | 0                           | 6                          | 7         | Water         | -22.2                           |
|                       | 5            | 50                        | 0                          | 0                           | 1                          | 7         | Water         | -47.2                           |
|                       | 5            | 50                        | 0                          | 0                           | 2                          | 7         | Water         | -42.2                           |

|                      |    |    |   |         |       |     |       |       |
|----------------------|----|----|---|---------|-------|-----|-------|-------|
|                      | 5  | 50 | 0 | 0       | 3     | 7   | Water | -35.1 |
|                      | 5  | 50 | 0 | 0       | 4     | 7   | Water | -27.3 |
|                      | 5  | 50 | 0 | 0       | 5     | 7   | Water | -25.3 |
|                      | 5  | 50 | 0 | 0       | 6     | 7   | Water | -24   |
| Bayat et al. [4]     | 26 | 20 | 0 | 0       | 0.005 | 6.4 | Water | -28.1 |
| Al-Ansari et al. [5] | 25 | 10 | 0 | 10000   | 0.1   | 6.3 | Water | -5    |
|                      | 25 | 0  | 0 | 10000   | 0     | 6.3 | Water | -40   |
| Muneer et al. [6]    | 25 | 20 | 0 | 5844    | 0.05  | 7   | Water | -28.7 |
|                      | 25 | 20 | 0 | 11688   | 0.05  | 7   | Water | -21.8 |
|                      | 25 | 20 | 0 | 17532   | 0.05  | 7   | Water | -18.3 |
|                      | 25 | 20 | 0 | 23376   | 0.05  | 7   | Water | -15.9 |
| Chequer et al. [7]   | 22 | 0  | 0 | 35064   | 0     | 7   | Sand  | -17.9 |
|                      | 22 | 0  | 0 | 23376   | 0     | 7   | Sand  | -21.2 |
|                      | 22 | 0  | 0 | 11688   | 0     | 7   | Sand  | -24.2 |
|                      | 22 | 0  | 0 | 5844    | 0     | 7   | Sand  | -30.7 |
|                      | 22 | 0  | 0 | 2922    | 0     | 7   | Sand  | -33.8 |
|                      | 22 | 0  | 0 | 1753.2  | 0     | 7   | Sand  | -34   |
| Fogden et al. [8]    | 25 | 0  | 0 | 999.3   | 0     | 7   | Sand  | -39   |
| Lebedeva et al. [9]  | 25 | 0  | 0 | 4383    | 0     | 7   | Sand  | -36.6 |
|                      | 25 | 0  | 0 | 43830   | 0     | 7   | Sand  | -14.7 |
| Hussain et al. [10]  | 25 | 0  | 0 | 2922    | 0     | 7   | Sand  | -30   |
|                      | 25 | 0  | 0 | 14610   | 0     | 7   | Sand  | -30   |
|                      | 25 | 0  | 0 | 29220   | 0     | 7   | Sand  | -20   |
| Xie et al. [11]      | 25 | 0  | 0 | 9999.1  | 0     | 7   | Sand  | -30   |
| Shehata et al. [12]  | 25 | 0  | 0 | 50007.1 | 0     | 7   | Sand  | -12   |
|                      | 25 | 0  | 0 | 5844    | 0     | 7   | Sand  | -31   |
|                      | 25 | 0  | 0 | 5002.5  | 0     | 7   | Sand  | -32   |
|                      | 25 | 0  | 0 | 1987.0  | 0     | 7   | Sand  | -35   |
| Walker et al. [13]   | 25 | 0  | 0 | 29220   | 0     | 7   | Sand  | -21   |
|                      | 25 | 0  | 0 | 40908   | 0     | 7   | Sand  | -16   |
| Chequer et al. [7]   | 25 | 0  | 0 | 1461    | 0     | 7   | Sand  | -34   |
|                      | 25 | 0  | 0 | 2922    | 0     | 7   | Sand  | -34   |
|                      | 25 | 0  | 0 | 11688   | 0     | 7   | Sand  | -24   |
|                      | 25 | 0  | 0 | 23376   | 0     | 7   | Sand  | -21   |
| Nasralla et al. [14] | 25 | 0  | 0 | 2000    | 0     | 7.7 | Sand  | -35   |
| Xie et al. [15]      | 65 | 0  | 0 | 2000    | 0     | 8.1 | Sand  | -23.7 |
| Xie et al. [11]      | 25 | 0  | 0 | 2000    | 0     | 8.1 | Sand  | -33   |
| Yao et al. [16]      | 25 | 0  | 0 | 0       | 0     | 9.2 | Sand  | -23   |
| Muneer et al. [17]   | 25 | 0  | 0 | 11688   | 0     | 6.9 | Sand  | -29.5 |
|                      | 25 | 0  | 0 | 8766    | 0     | 6.9 | Sand  | -30.6 |
|                      | 25 | 0  | 0 | 6428.4  | 0     | 6.9 | Sand  | -30.9 |

|                           |       |    |        |        |      |      |      |       |
|---------------------------|-------|----|--------|--------|------|------|------|-------|
| Alkafeef et al.<br>[18]   | 25    | 0  | 0      | 5844   | 0    | 6.9  | Sand | -30.8 |
|                           | 25    | 0  | 0.7    | 0      | 0    | 6    | Sand | -75   |
|                           | 25    | 0  | 521.9  | 0      | 0    | 6    | Sand | -57   |
|                           | 25    | 0  | 820.1  | 0      | 0    | 6    | Sand | -48   |
|                           | 25    | 0  | 2012.9 | 0      | 0    | 6    | Sand | -27   |
|                           | 25    | 0  | 5964.1 | 0      | 0    | 6    | Sand | -16   |
|                           | 25    | 0  | 7455.1 | 0      | 0    | 6    | Sand | -11   |
| Muneer et<br>al. [6]      | 24.15 | 0  | 0      | 11688  | 0    | 7    | Sand | -29.5 |
|                           | 24.15 | 0  | 0      | 8766   | 0    | 7    | Sand | -30.6 |
|                           | 24.15 | 0  | 0      | 6428.4 | 0    | 7    | Sand | -30.9 |
|                           | 24.15 | 0  | 0      | 5844   | 0    | 7    | Sand | -30.8 |
|                           | 24.15 | 0  | 0      | 5259.6 | 0    | 7    | Sand | -31.6 |
|                           | 24.15 | 0  | 0      | 4967.4 | 0    | 7    | Sand | -32   |
|                           | 24.15 | 0  | 0      | 4675.2 | 0    | 7    | Sand | -32.5 |
|                           | 24.15 | 0  | 0      | 4383   | 0    | 7    | Sand | -33.3 |
|                           | 24.15 | 0  | 0      | 4090.8 | 0    | 7    | Sand | -32.8 |
|                           | 24.15 | 0  | 0      | 3506.4 | 0    | 7    | Sand | -33.6 |
|                           | 24.15 | 0  | 0      | 2922   | 0    | 7    | Sand | -35.2 |
|                           | 24.15 | 20 | 0      | 5844   | 0.05 | 7    | Sand | -28.2 |
|                           | 24.15 | 20 | 0      | 4967.4 | 0.05 | 7    | Sand | -28.9 |
|                           | 24.15 | 20 | 0      | 4090.8 | 0.05 | 7    | Sand | -29.1 |
|                           | 24.15 | 20 | 0      | 2922   | 0.05 | 7    | Sand | -30.5 |
|                           | 24.15 | 20 | 0      | 5844   | 0.1  | 7    | Sand | -27   |
|                           | 24.15 | 20 | 0      | 4967.4 | 0.1  | 7    | Sand | -27.5 |
|                           | 24.15 | 20 | 0      | 3506.4 | 0.1  | 7    | Sand | -28.5 |
|                           | 24.15 | 20 | 0      | 2922   | 0.1  | 7    | Sand | -28.6 |
| Vinogradov<br>et al. [19] | 21    | 0  | 0      | 876.6  | 0    | 6.5  | Sand | -20.3 |
|                           | 21    | 0  | 0      | 26298  | 0    | 7.1  | Sand | -10.9 |
|                           | 21    | 0  | 0      | 11688  | 0    | 7.1  | Sand | -10.5 |
|                           | 15    | 0  | 0      | 876.6  | 0    | 6.5  | Sand | -21.9 |
|                           | 21    | 0  | 0      | 876.6  | 0    | 6.5  | Sand | -20.6 |
|                           | 38    | 0  | 0      | 876.6  | 0    | 6.25 | Sand | -17.6 |
|                           | 77.1  | 0  | 0      | 876.6  | 0    | 6.1  | Sand | -15.3 |
|                           | 118   | 0  | 0      | 876.6  | 0    | 5.8  | Sand | -13.2 |
| Vinogradov<br>et al. [20] | 145   | 0  | 0      | 876.6  | 0    | 5.8  | Sand | -11   |
|                           | 18    | 0  | 0      | 584.4  | 0    | 6.8  | Sand | -23.9 |
|                           | 39    | 0  | 0      | 584.4  | 0    | 6.45 | Sand | -15.6 |
|                           | 78    | 0  | 0      | 584.4  | 0    | 5.82 | Sand | -11.2 |
|                           | 83    | 0  | 0      | 584.4  | 0    | 5.95 | Sand | -11.4 |
|                           | 118   | 0  | 0      | 584.4  | 0    | 5.95 | Sand | -10.6 |
|                           | 122   | 0  | 0      | 584.4  | 0    | 5.95 | Sand | -10.4 |
|                           | 147   | 0  | 0      | 584.4  | 0    | 5.95 | Sand | -9.17 |

|                           |      |     |   |         |     |      |             |       |
|---------------------------|------|-----|---|---------|-----|------|-------------|-------|
| Vinogradov<br>et al. [19] | 19.5 | 0   | 0 | 26298   | 0   | 7.25 | Sand        | -11.2 |
|                           | 21   | 0   | 0 | 26298   | 0   | 7.25 | Sand        | -11.1 |
|                           | 38   | 0   | 0 | 26298   | 0   | 7.25 | Sand        | -10.8 |
|                           | 78   | 0   | 0 | 26298   | 0   | 7.25 | Sand        | -10.4 |
|                           | 118  | 0   | 0 | 26298   | 0   | 7.25 | Sand        | -10.2 |
|                           | 134  | 0   | 0 | 26298   | 0   | 7.25 | Sand        | -9.08 |
|                           | 19.5 | 0   | 0 | 11688   | 0   | 7.25 | Sand        | -10.8 |
|                           | 20.7 | 0   | 0 | 11688   | 0   | 7.25 | Sand        | -10.5 |
|                           | 62.4 | 0   | 0 | 11688   | 0   | 7.25 | Sand        | -10.2 |
|                           | 64.3 | 0   | 0 | 11688   | 0   | 7.25 | Sand        | -10.7 |
|                           | 110  | 0   | 0 | 11688   | 0   | 7.25 | Sand        | -10.9 |
| Vinogradov<br>et al. [20] | 111  | 0   | 0 | 11688   | 0   | 7.25 | Sand        | -10.6 |
|                           | 19.5 | 0   | 0 | 29220   | 0   | 7.25 | Sand        | -9.35 |
|                           | 37.3 | 0   | 0 | 29220   | 0   | 7.25 | Sand        | -10.2 |
|                           | 71   | 0   | 0 | 29220   | 0   | 7.25 | Sand        | -8.67 |
|                           | 112  | 0   | 0 | 29220   | 0   | 7.25 | Sand        | -10.5 |
| Vinogradov<br>et al. [21] | 140  | 0   | 0 | 29220   | 0   | 7.25 | Sand        | -10.8 |
|                           | 23   | 0   | 0 | 9.8     | 0   | 7    | Sand        | -52   |
|                           | 23   | 0   | 0 | 16.0    | 0   | 7    | Sand        | -56.2 |
|                           | 23   | 0   | 0 | 31.0    | 0   | 7    | Sand        | -55.7 |
|                           | 23   | 0   | 0 | 114.5   | 0   | 7    | Sand        | -52.3 |
|                           | 23   | 0   | 0 | 736.3   | 0   | 7    | Sand        | -45.1 |
|                           | 23   | 0   | 0 | 1916.8  | 0   | 7    | Sand        | -34.2 |
|                           | 23   | 0   | 0 | 3897.9  | 0   | 7    | Sand        | -26.7 |
|                           | 23   | 0   | 0 | 8649.1  | 0   | 7    | Sand        | -16.7 |
|                           | 23   | 0   | 0 | 15428.2 | 0   | 7    | Sand        | -10.3 |
|                           | 23   | 0   | 0 | 37401.6 | 0   | 7    | Sand        | -20.3 |
|                           | 23   | 0   | 0 | 66621.6 | 0   | 7    | Sand        | -23.7 |
|                           | 23   | 0   | 0 | 141425  | 0   | 7    | Sand        | -19.5 |
|                           | 23   | 0   | 0 | 161294  | 0   | 7    | Sand        | -13.1 |
|                           | 23   | 0   | 0 | 314407  | 0   | 7    | Sand        | -18.6 |
| Chequer et<br>al. [7]     | 22   | 0   | 0 | 35064   | 0   | 7    | Glass beads | -15.9 |
|                           | 22   | 0   | 0 | 23376   | 0   | 7    | Glass beads | -16.8 |
|                           | 22   | 0   | 0 | 17532   | 0   | 7    | Glass beads | -17.2 |
|                           | 22   | 0   | 0 | 11688   | 0   | 7    | Glass beads | -17.7 |
|                           | 22   | 0   | 0 | 5844    | 0   | 7    | Glass beads | -24.8 |
|                           | 22   | 0   | 0 | 2922    | 0   | 7    | Glass beads | -36.7 |
|                           | 22   | 0   | 0 | 1753.2  | 0   | 7    | Glass beads | -47.5 |
|                           | 22   | 0   | 0 | 584.4   | 0   | 7    | Glass beads | -54.9 |
|                           | 22   | 0   | 0 | 58.44   | 0   | 7    | Glass beads | -55.5 |
| Ahmadi et al.<br>[22]     | 25   | 48  | 0 | 0       | 0.1 | 7    | Glass beads | -22.5 |
| Hasannejad<br>et al. [23] | 25   | 145 | 0 | 17532   | 0.1 | 7    | Glass beads | -25   |
|                           | 25   | 0   | 0 | 17532   | 0   | 7    | Glass beads | -28   |

|                      |    |    |        |        |     |      |             |        |
|----------------------|----|----|--------|--------|-----|------|-------------|--------|
| Mansouri et al. [24] | 25 | 15 | 0      | 1753.2 | 0.1 | 5.9  | Glass beads | -7.5   |
|                      | 25 | 0  | 0      | 1753.2 | 0   | 5.9  | Glass beads | -25    |
| Assef et al. [25]    | 25 | 0  | 0      | 1168.8 | 0   | 6.5  | Glass beads | -24.3  |
|                      | 25 | 0  | 745.51 | 0      | 0   | 6.5  | Glass beads | -27.7  |
|                      | 25 | 0  | 0      | 0      | 0   | 6.5  | Glass beads | -39.5  |
|                      | 25 | 0  | 745.51 | 0      | 0   | 2    | Glass beads | 1      |
|                      | 25 | 0  | 745.51 | 0      | 0   | 2.5  | Glass beads | 0.429  |
|                      | 25 | 0  | 745.51 | 0      | 0   | 3    | Glass beads | -0.143 |
|                      | 25 | 0  | 745.51 | 0      | 0   | 3.5  | Glass beads | -2.43  |
|                      | 25 | 0  | 745.51 | 0      | 0   | 4    | Glass beads | -3.57  |
|                      | 25 | 0  | 745.51 | 0      | 0   | 4.4  | Glass beads | -9     |
|                      | 25 | 0  | 745.51 | 0      | 0   | 5.2  | Glass beads | -13    |
|                      | 25 | 0  | 745.51 | 0      | 0   | 5.9  | Glass beads | -21.1  |
|                      | 25 | 0  | 745.51 | 0      | 0   | 6.25 | Glass beads | -25.1  |
|                      | 25 | 0  | 745.51 | 0      | 0   | 7    | Glass beads | -39.6  |
|                      | 25 | 0  | 745.51 | 0      | 0   | 7.5  | Glass beads | -47    |
|                      | 25 | 0  | 745.51 | 0      | 0   | 8    | Glass beads | -58    |
|                      | 25 | 0  | 745.51 | 0      | 0   | 8.75 | Glass beads | -59    |
|                      | 25 | 0  | 20000  | 0      | 0   | 7    | Coal-fines  | -12.61 |
| Huang et al. [26]    | 23 | 0  | 0      | 0      | 0   | 6    | Coal-fines  | -7.7   |
| Awan et al. [27]     | 23 | 0  | 0      | 0      | 0   | 6.5  | Coal-fines  | -22.4  |
|                      | 23 | 0  | 0      | 0      | 0   | 7    | Coal-fines  | -26.4  |
|                      | 23 | 0  | 0      | 0      | 0   | 7.5  | Coal-fines  | -31.2  |
|                      | 23 | 0  | 0      | 0      | 0   | 8    | Coal-fines  | -33.8  |
|                      | 23 | 0  | 0      | 0      | 0   | 8.5  | Coal-fines  | -35.0  |
|                      | 23 | 0  | 0      | 0      | 0   | 9    | Coal-fines  | -38.7  |
|                      | 23 | 0  | 0      | 0      | 0   | 9.5  | Coal-fines  | -37.9  |
|                      | 23 | 0  | 0      | 0      | 0   | 10   | Coal-fines  | -40.5  |
|                      | 23 | 0  | 0      | 0      | 0   | 10.5 | Coal-fines  | -40.4  |
|                      | 23 | 0  | 0      | 0      | 0   | 11   | Coal-fines  | -42.1  |
|                      | 23 | 0  | 0      | 58.4   | 0   | 6    | Coal-fines  | -3.8   |
|                      | 23 | 0  | 0      | 58.4   | 0   | 6.5  | Coal-fines  | -15.8  |
|                      | 23 | 0  | 0      | 58.4   | 0   | 7    | Coal-fines  | -22.4  |
|                      | 23 | 0  | 0      | 58.4   | 0   | 7.5  | Coal-fines  | -31.6  |
|                      | 23 | 0  | 0      | 58.4   | 0   | 8    | Coal-fines  | -35.1  |
|                      | 23 | 0  | 0      | 58.4   | 0   | 8.5  | Coal-fines  | -41.4  |
|                      | 23 | 0  | 0      | 58.4   | 0   | 9    | Coal-fines  | -47.8  |
|                      | 23 | 0  | 0      | 58.4   | 0   | 9.5  | Coal-fines  | -52.2  |
|                      | 23 | 0  | 0      | 58.4   | 0   | 10   | Coal-fines  | -52.3  |
|                      | 23 | 0  | 0      | 58.4   | 0   | 10.5 | Coal-fines  | -55.9  |
|                      | 23 | 0  | 0      | 58.4   | 0   | 11   | Coal-fines  | -58.3  |
|                      | 23 | 0  | 0      | 584.4  | 0   | 6    | Coal-fines  | 2.4    |
|                      | 23 | 0  | 0      | 584.4  | 0   | 6.5  | Coal-fines  | 1.7    |
|                      | 23 | 0  | 0      | 584.4  | 0   | 7    | Coal-fines  | -8.6   |

|                       |    |   |   |       |   |      |            |        |
|-----------------------|----|---|---|-------|---|------|------------|--------|
|                       | 23 | 0 | 0 | 584.4 | 0 | 7.5  | Coal-fines | -18.7  |
|                       | 23 | 0 | 0 | 584.4 | 0 | 8    | Coal-fines | -28.0  |
|                       | 23 | 0 | 0 | 584.4 | 0 | 8.5  | Coal-fines | -33.8  |
|                       | 23 | 0 | 0 | 584.4 | 0 | 9    | Coal-fines | -43.6  |
|                       | 23 | 0 | 0 | 584.4 | 0 | 9.5  | Coal-fines | -47.5  |
|                       | 23 | 0 | 0 | 584.4 | 0 | 10   | Coal-fines | -53.0  |
|                       | 23 | 0 | 0 | 584.4 | 0 | 10.5 | Coal-fines | -56.9  |
|                       | 23 | 0 | 0 | 584.4 | 0 | 11   | Coal-fines | -58.7  |
|                       | 23 | 0 | 0 | 5844  | 0 | 6    | Coal-fines | 6.9    |
|                       | 23 | 0 | 0 | 5844  | 0 | 6.5  | Coal-fines | 4.7    |
|                       | 23 | 0 | 0 | 5844  | 0 | 7    | Coal-fines | 0.6    |
|                       | 23 | 0 | 0 | 5844  | 0 | 7.5  | Coal-fines | -7.5   |
|                       | 23 | 0 | 0 | 5844  | 0 | 8    | Coal-fines | -10.1  |
|                       | 23 | 0 | 0 | 5844  | 0 | 8.5  | Coal-fines | -15.0  |
|                       | 23 | 0 | 0 | 5844  | 0 | 9    | Coal-fines | -17.7  |
|                       | 23 | 0 | 0 | 5844  | 0 | 9.5  | Coal-fines | -21.2  |
|                       | 23 | 0 | 0 | 5844  | 0 | 10   | Coal-fines | -26.9  |
|                       | 23 | 0 | 0 | 5844  | 0 | 10.5 | Coal-fines | -29.0  |
|                       | 23 | 0 | 0 | 5844  | 0 | 11   | Coal-fines | -31.1  |
|                       | 23 | 0 | 0 | 17532 | 0 | 6    | Coal-fines | -5.1   |
|                       | 23 | 0 | 0 | 17532 | 0 | 6.5  | Coal-fines | -6.2   |
|                       | 23 | 0 | 0 | 17532 | 0 | 7    | Coal-fines | -8.0   |
|                       | 23 | 0 | 0 | 17532 | 0 | 7.5  | Coal-fines | -9.8   |
|                       | 23 | 0 | 0 | 17532 | 0 | 8    | Coal-fines | -12.8  |
|                       | 23 | 0 | 0 | 17532 | 0 | 8.5  | Coal-fines | -16.2  |
|                       | 23 | 0 | 0 | 17532 | 0 | 9    | Coal-fines | -16.9  |
|                       | 23 | 0 | 0 | 17532 | 0 | 9.5  | Coal-fines | -21.3  |
|                       | 23 | 0 | 0 | 17532 | 0 | 10   | Coal-fines | -25.2  |
|                       | 23 | 0 | 0 | 17532 | 0 | 10.5 | Coal-fines | -26.8  |
|                       | 23 | 0 | 0 | 17532 | 0 | 11   | Coal-fines | -30.1  |
|                       | 23 | 0 | 0 | 35064 | 0 | 6    | Coal-fines | -6.0   |
|                       | 23 | 0 | 0 | 35064 | 0 | 6.5  | Coal-fines | -9.5   |
|                       | 23 | 0 | 0 | 35064 | 0 | 7    | Coal-fines | -13.2  |
|                       | 23 | 0 | 0 | 35064 | 0 | 7.5  | Coal-fines | -13.7  |
|                       | 23 | 0 | 0 | 35064 | 0 | 8    | Coal-fines | -15.1  |
|                       | 23 | 0 | 0 | 35064 | 0 | 8.5  | Coal-fines | -15.9  |
|                       | 23 | 0 | 0 | 35064 | 0 | 9    | Coal-fines | -17.4  |
|                       | 23 | 0 | 0 | 35064 | 0 | 9.5  | Coal-fines | -20.4  |
|                       | 23 | 0 | 0 | 35064 | 0 | 10   | Coal-fines | -21.5  |
|                       | 23 | 0 | 0 | 35064 | 0 | 10.5 | Coal-fines | -22.9  |
|                       | 23 | 0 | 0 | 35064 | 0 | 11   | Coal-fines | -27.5  |
| Chequer et<br>al. [7] | 22 | 0 | 0 | 35064 | 0 | 7    | Kaolinite  | -23.02 |
|                       | 22 | 0 | 0 | 23376 | 0 | 7    | Kaolinite  | -28.94 |
|                       | 22 | 0 | 0 | 11688 | 0 | 7    | Kaolinite  | -30.37 |
|                       | 22 | 0 | 0 | 5844  | 0 | 7    | Kaolinite  | -32.36 |

|                             |    |   |   |       |   |   |           |        |
|-----------------------------|----|---|---|-------|---|---|-----------|--------|
| Tangparitkul<br>et al. [28] | 22 | 0 | 0 | 2922  | 0 | 7 | Kaolinite | -37.64 |
|                             | 22 | 0 | 0 | 514.3 | 0 | 7 | Kaolinite | -49.56 |
|                             | 25 | 0 | 0 | 30.0  | 0 | 7 | Kaolinite | -50    |

## References

1. Parizad, A.; Shahbazi, K.; Tanha, A.A. SiO<sub>2</sub> Nanoparticle and KCl Salt Effects on Filtration and Thixotropic Behavior of Polymeric Water Based Drilling Fluid: With Zeta Potential and Size Analysis. *Results Phys.* **2018**, *9*, 1656–1665.
2. Ma, X.; Lee, N.-H.; Oh, H.-J.; Kim, J.-W.; Rhee, C.-K.; Park, K.-S.; Kim, S.-J. Surface Modification and Characterization of Highly Dispersed Silica Nanoparticles by a Cationic Surfactant. *Colloids Surfaces A Physicochem. Eng. Asp.* **2010**, *358*, 172–176.
3. Wang, R.; Liu, T.; Ning, F.; Ou, W.; Zhang, L.; Wang, Z.; Peng, L.; Sun, J.; Liu, Z.; Li, T. Effect of Hydrophilic Silica Nanoparticles on Hydrate Formation: Insight from the Experimental Study. *J. Energy Chem.* **2019**, *30*, 90–100.
4. Esfandyari Bayat, A.; Junin, R.; Shamshirband, S.; Tong Chong, W. Transport and Retention of Engineered Al<sub>2</sub>O<sub>3</sub>, TiO<sub>2</sub> and SiO<sub>2</sub> Nanoparticles through Various Sedimentary Rocks. *Sci. Rep.* **2015**, *5*, 1–12.
5. Al-Anssari, S.; Arif, M.; Wang, S.; Barifcani, A.; Iglauer, S. Stabilising Nanofluids in Saline Environments. *J. Colloid Interface Sci.* **2017**, *508*, 222–229.
6. Muneer, R.; Hashmet, M.R.; Pourafshary, P. DLVO Modeling to Predict Critical Salt Concentration to Initiate Fines Migration Pre-and Post-Nanofluid Treatment in Sandstones. *SPE J.* **2022**, 1–15.
7. Chequer, L.; Bedrikovetsky, P.; Carageorgos, T.; Badalyan, A.; Gitis, V. Mobilization of Attached Clustered Colloids in Porous Media. *Water Resour. Res.* **2019**, *55*, 5696–5714.
8. Fogden, A. Effect of Water Salinity and PH on the Wettability of a Model Substrate. *Energy & fuels* **2011**, *25*, 5113–5125.
9. Lebedeva, E. V; Fogden, A. Micro-CT and Wettability Analysis of Oil Recovery from Sand Packs and the Effect of Waterflood Salinity and Kaolinite. *Energy & Fuels* **2011**, *25*, 5683–5694.
10. Hussain, F.; Zeinijahromi, A.; Bedrikovetsky, P.; Badalyan, A.; Carageorgos, T.; Cinar, Y. An Experimental Study of Improved Oil Recovery through Fines-Assisted Waterflooding. *J. Pet. Sci. Eng.* **2013**, *109*, 187–197.
11. Xie, Q.; Saeedi, A.; Pooryousefy, E.; Liu, Y. Extended DLVO-Based Estimates of Surface Force in Low Salinity Water Flooding. *J. Mol. Liq.* **2016**, *221*, 658–665.
12. Shehata, A.M.; Nasr-El-Din, H.A. Zeta Potential Measurements: Impact of Salinity on Sandstone Minerals. *Proc. - SPE Int. Symp. Oilf. Chem.* **2015**, *2*, 789–805, doi:10.2118/173763-MS.
13. Walker, E.; Glover, P.W.J. Measurements of the Relationship between Microstructure, PH, and the Streaming and Zeta Potentials of Sandstones. *Transp. porous media* **2018**, *121*, 183–206.
14. Nasralla, R.A.; Nasr-El-Din, H.A. Double-Layer Expansion: Is It a Primary Mechanism of Improved Oil Recovery by Low-Salinity Waterflooding? *Proc. - SPE Symp. Improv. Oil*



*Recover.* **2012**, 2, 1624–1640, doi:10.2118/154334-MS.

15. Xie, Q.; Liu, Y.; Wu, J.; Liu, Q. Ions Tuning Water Flooding Experiments and Interpretation by Thermodynamics of Wettability. *J. Pet. Sci. Eng.* **2014**, 124, 350–358.
16. Yao, J.; Han, H.; Hou, Y.; Gong, E.; Yin, W. A Method of Calculating the Interaction Energy between Particles in Minerals Flotation. *Math. Probl. Eng.* **2016**, 2016.
17. Muneer, R.; Hashmet, M.R.; Pourafshary, P. Predicting the Critical Salt Concentrations of Monovalent and Divalent Brines to Initiate Fines Migration Using DLVO Modeling. *J. Mol. Liq.* **2022**, 352, 118690.
18. Alkafeef, S.F.; Alajmi, A.F. Streaming Potentials and Conductivities of Reservoir Rock Cores in Aqueous and Non-Aqueous Liquids. *Colloids Surfaces A Physicochem. Eng. Asp.* **2006**, 289, 141–148.
19. Vinogradov, J.; Jackson, M.D.; Chamerois, M. Zeta Potential in Sandpacks: Effect of Temperature, Electrolyte PH, Ionic Strength and Divalent Cations. *Colloids Surfaces A Physicochem. Eng. Asp.* **2018**, 553, 259–271.
20. Vinogradov, J.; Jackson, M.D. Zeta Potential in Intact Natural Sandstones at Elevated Temperatures. *Geophys. Res. Lett.* **2015**, 42, 6287–6294.
21. Vinogradov, J.; Jaafar, M.Z.; Jackson, M.D. Measurement of Streaming Potential Coupling Coefficient in Sandstones Saturated with Natural and Artificial Brines at High Salinity. *J. Geophys. Res. Solid Earth* **2010**, 115.
22. Ahmadi, M.; Habibi, A.; Pourafshary, P.; Ayatollahi, S. An Experimental Study of Interaction between Nanoparticles' Deposition on a Sintered Porous Medium and Migratory Fines. *J. Porous Media* **2013**, 16.
23. HASANNEJAD, R.; Pourafshary, P.; Vatani, A.; Sameni, A. Application of Silica Nanofluid to Control Initiation of Fines Migration. *Pet. Explor. Dev.* **2017**, 44, 850–859.
24. Mansouri, M.; Nakhaee, A.; Pourafshary, P. Effect of SiO<sub>2</sub> Nanoparticles on Fines Stabilization during Low Salinity Water Flooding in Sandstones. *J. Pet. Sci. Eng.* **2019**, 174, 637–648.
25. Assef, Y.; Arab, D.; Pourafshary, P. Application of Nanofluid to Control Fines Migration to Improve the Performance of Low Salinity Water Flooding and Alkaline Flooding. *J. Pet. Sci. Eng.* **2014**, 124, 331–340.
26. Huang, F.; Kang, Y.; You, L.; Li, X.; You, Z. Massive Fines Detachment Induced by Moving Gas-Water Interfaces during Early Stage Two-Phase Flow in Coalbed Methane Reservoirs. *Fuel* **2018**, 222, 193–206.
27. Awan, F.U.R.; Keshavarz, A.; Akhondzadeh, H.; Al-Anssari, S.; Al-Yaseri, A.; Nosrati, A.; Ali, M.; Iglauer, S. Stable Dispersion of Coal Fines during Hydraulic Fracturing Flowback in Coal Seam Gas Reservoirs—an Experimental Study. *Energy & Fuels* **2020**, 34, 5566–5577.
28. Tangparitkul, S.; Saul, A.; Leelasukseree, C.; Yusuf, M.; Kalantariasl, A. Fines Migration

and Permeability Decline during Reservoir Depletion Coupled with Clay Swelling Due to Low-Salinity Water Injection: An Analytical Study. *J. Pet. Sci. Eng.* **2020**, *194*, 107448.
